# Supplementary material
Source: PubMed Central journal article supplement (PMC6276884)

## Appendix

### Infiltrative and drug-resistant slow-cycling cells support metabolic heterogeneity in glioblastoma

LB Hoang-Minh, FA Siebzehnruhl, C Yang, S Suzuki-Hatano, K Dajac, T Loche, N Andrews, M Schmoll, J Patel, K Amin, A Vuong, A Jimenez-Pascual, P Kubilis, TT Garrett, C Money Penny, CA Pacak, J Huang, EJ Sayour, DA Mitchell, MR Sarkisian, BA Reynolds, LP Deleyrolle

#### Table of contents

|                    |      |
|--------------------|------|
| Appendix Figure S1 | p. 2 |
| Appendix Figure S2 | p. 3 |
| Appendix Figure S3 | p. 4 |

#### Appendix Figure Legends

**Appendix Figure S1:** (A) SCCs and FCCs were cultured in high glucose (HG, > 500 mg/dL) or physiological glucose (PG, 90-110 mg/dL) conditions for 24 hours. Cell death was quantified by flow cytometry through propidium iodide (PI) incorporation (L1, n=2; L2, n=4) (A) and cleaved caspase 3 expression (L1, n=2; L2, n=3) (B) SCCs and FCCs were cultured in 0, 5, or 20 mM 2DG for 24 hours and cell death quantified by flow cytometry through propidium iodide (PI) incorporation (L1, n=2; L2, n=4) and cleaved caspase 3 expression (L1, n=2; L2, n=3). (C) Using RT-qPCR, expression levels of the isoforms A, B, and C of lactate dehydrogenase were compared between SCCs and FCCs (n=3 technical replicates for each line) of the three hGBM cell lines. Changes in transcript levels are given as the mean percent change relative to FCCs. \* p < 0.05, \*\*\* p < 0.001, one sample t-test. The combinatorial effect of administering glucose restriction and mitochondrial targeting with rotenone (n=16, D) or metformin (n=16, E) was measured using the CyQUANT assay after 24 hours of treatment for L0 and L2 hGBM cell lines (\* p < 0.05, \*\*\* p < 0.001, one-way ANOVA with Tukey post-test, ## p < 0.01, t-test).

**Appendix Figure S2:** List of all the pathways up-regulated in the SCCs, based on metabolites that are over-represented in SCCs compared to FCCs (fold change  $\geq 2$ ).

**Appendix Figure S3:** (A) Raw values of mean fluorescence intensity (MFI) in SCCs and FCCs following LipidTox staining. GSEA of SCC and FCC RNA-seq data sets for enrichment of the autophagosome-lysosome signature, as defined by Perera *et. al.* (Perera et al., 2015) (B) and Jegga *et. al.* (Jegga et al., 2011) (C). FDR, false discovery rate; NES, normalized enrichment score; Nom., nominal. Raw values of mean fluorescence intensity (MFI) in SCCs and FCCs following immunostaining for LC3B (D) and LAMP2 (E).

Appendix Figure S1

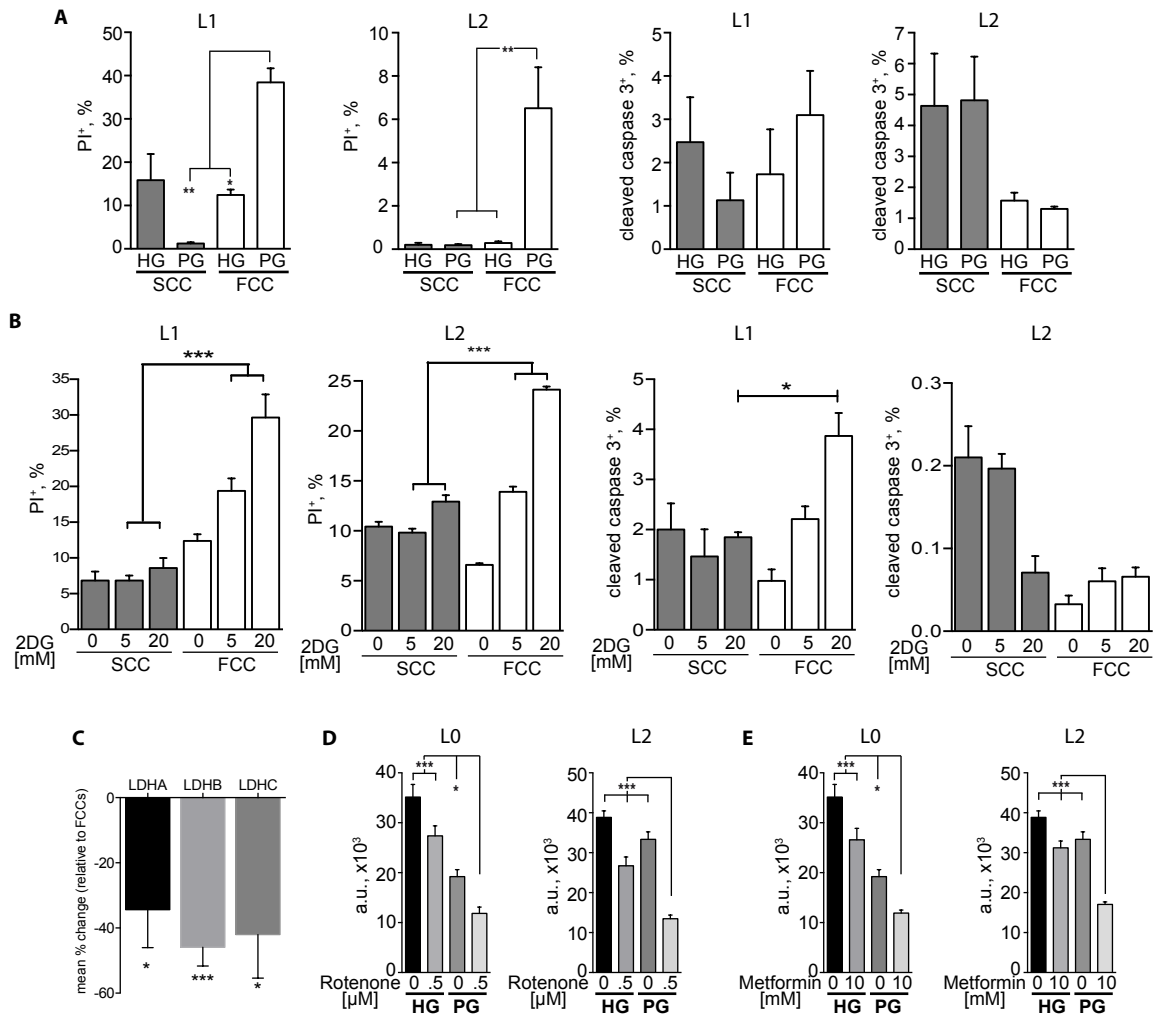

Appendix Figure S2

hGBM L0

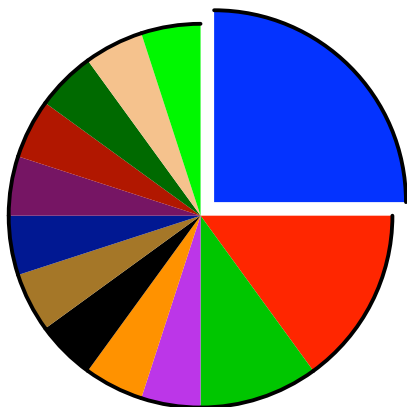

- Lipid pathway
- Pyrimidine metabolism
- purine metabolism
- Aerobic glycolysis
- Glutathione metabolism
- Oxocarboxylic acid metabolism
- Pentose phosphate metabolism
- Phenylpropanoid biosynthesis
- protein biosynthesis
- ribose metabolism
- tryptophan metabolism
- Other 1
- Other 2

hGBM L1

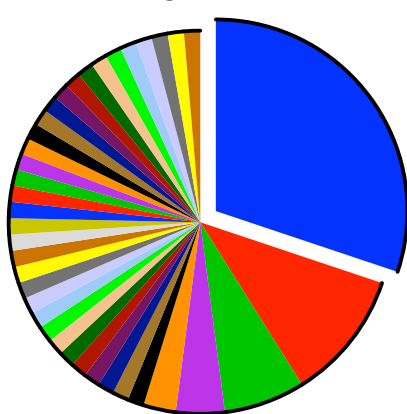

- Lipid metabolism
- Purine metabolism
- Pyrimidine metabolism
- Pentose metabolism
- Galactose metabolism
- Acetyl-CoA metabolism
- Aerobic glycolysis
- Oxocarboxylic acid metabolism
- Alanine, aspartate and glutamate metabolism
- Amino sugar and nucleotide sugar metabolism
- Ascorbate and aldarate metabolism
- Caffeine metabolism
- Carbohydrate metabolism
- Glucose metabolism
- Glycine, serine and threonine metabolism
- Indole diterpene alkaloid biosynthesis
- Nicotinate and nicotinamide metabolism
- Phenylalanine metabolism
- ribose metabolism
- Carcinogens
- Other 1
- Other 2
- Other 3
- Other 4
- Other 5
- Other 6
- Other 7
- Other 8
- Other 9
- Other 10
- Other 11
- Other 12
- Other 13
- Other 14
- Other 15
- Other 16
- Other 17
- Other 18

hGBM L2

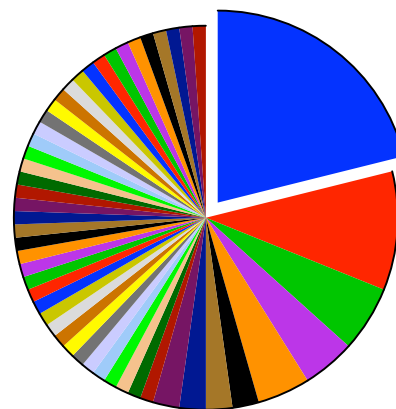

- Lipid metabolism
- Purine metabolism
- Pentose metabolism
- Galactose metabolism
- Pyrimidine metabolism
- Oxidative phosphorylation
- Glutathione metabolism
- Carbohydrates metabolism
- Carcinogen
- Acetyl-CoA metabolism
- Aerobic glycolysis
- Glutamine metabolism
- CoA biosynthesis
- Alanine, aspartate and glutamate metabolism
- Amino sugar and nucleotide sugar metabolism
- Arginine biosynthesis
- Caffeine metabolism
- Caprolactam degradation
- Folate biosynthesis
- Fructose and mannose metabolism
- Glycine, serine and threonine metabolism
- Histidine metabolism
- Indole diterpene alkaloid biosynthesis
- Metabolism of xenobiotics by cytochrome P450
- Nicotinate and nicotinamide metabolism
- Oxocarboxylic acid metabolism
- Phenylalanine metabolism
- Phosphonate and phosphinate metabolism
- Propanoate metabolism
- Starch and sucrose metabolism
- Other 1
- Other 11
- Other 2
- Other 12
- Other 3
- Other 13
- Other 4
- Other 14
- Other 5
- Other 15
- Other 6
- Other 16
- Other 7
- Other 17
- Other 18
- Other 9
- Other 19
- Other 10
- Other 20

Appendix Figure S3

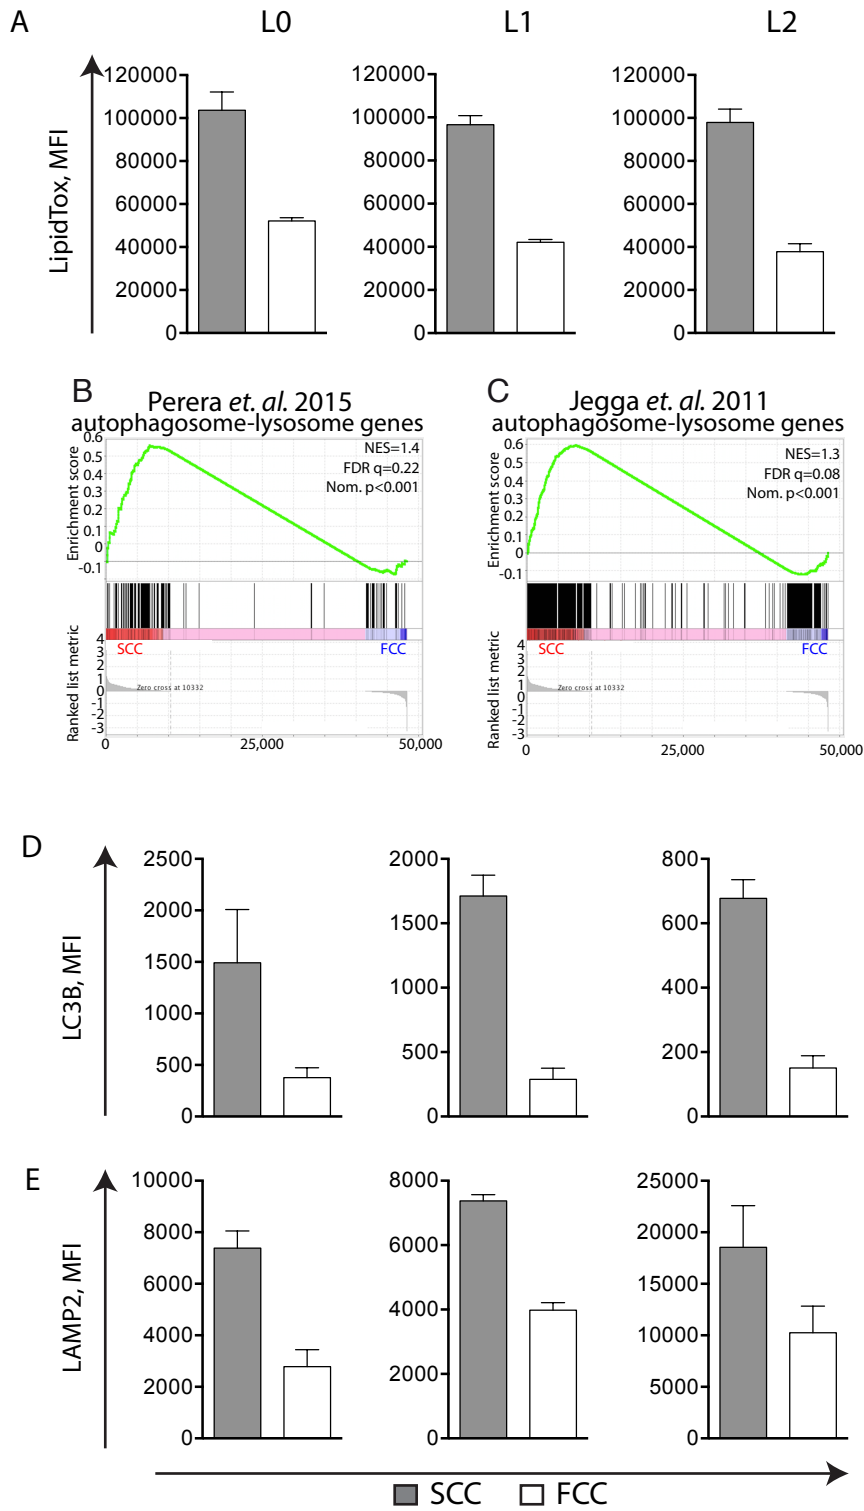

Supplement: EMBJ-37-e98772-s001.pdf [file EMBJ-37-e98772-s001.pdf]
